# Supplementary material
Source: ML conference proceedings conference paper supplement (https://www.ecva.net/papers/eccv_2020/papers_ECCV/html/123490137_ECCV_2020_paper.php)
Supplement: Supplementary file 2 [file 123490137-supp.zip]

Archive with 3 entries (3 files):
- 1624-supp.pdf
- MOT16-03-CTracker-POI.mp4
- MOT17-01-CTracker-Tracktor+CTdet.mp4
